# Supplementary material for: Medically Treated Self-Injury Among Children and Adolescents: Repeated Attempts and Service Use Over 1 Year
Source: Atypon-hosted journal article supplement (doi:10.1176/appi.ps.201900152), 2020-01-14
Supplement: appi.ps.201900152.ds001.pdf [file appi.ps.201900152.ds001.pdf]

*Online Supplemental Table 1. ICD-9 Codes utilized to identify self-injury.*

| ICD-9-CM Codes* | Description                                                     |
|-----------------|-----------------------------------------------------------------|
| 870-879         | Open wound of head, neck, and trunk                             |
| 880-897         | Open wound of limbs                                             |
| 960-979         | Poisoning by drugs, medicinals, and biological substances       |
| 980-989         | Toxic effects of substances chiefly nonmedicinal as to source   |
| E950-E959       | Suicide and self-inflicted injury                               |
| E980-E989       | Injury undetermined whether accidentally or purposely inflicted |
| V6284           | Suicidal ideation                                               |

\*Note. The corresponding ICD10 codes were also used but are not listed due to their non-contiguous numbering.

## Flow of Medically Treated Self-Injury Patients

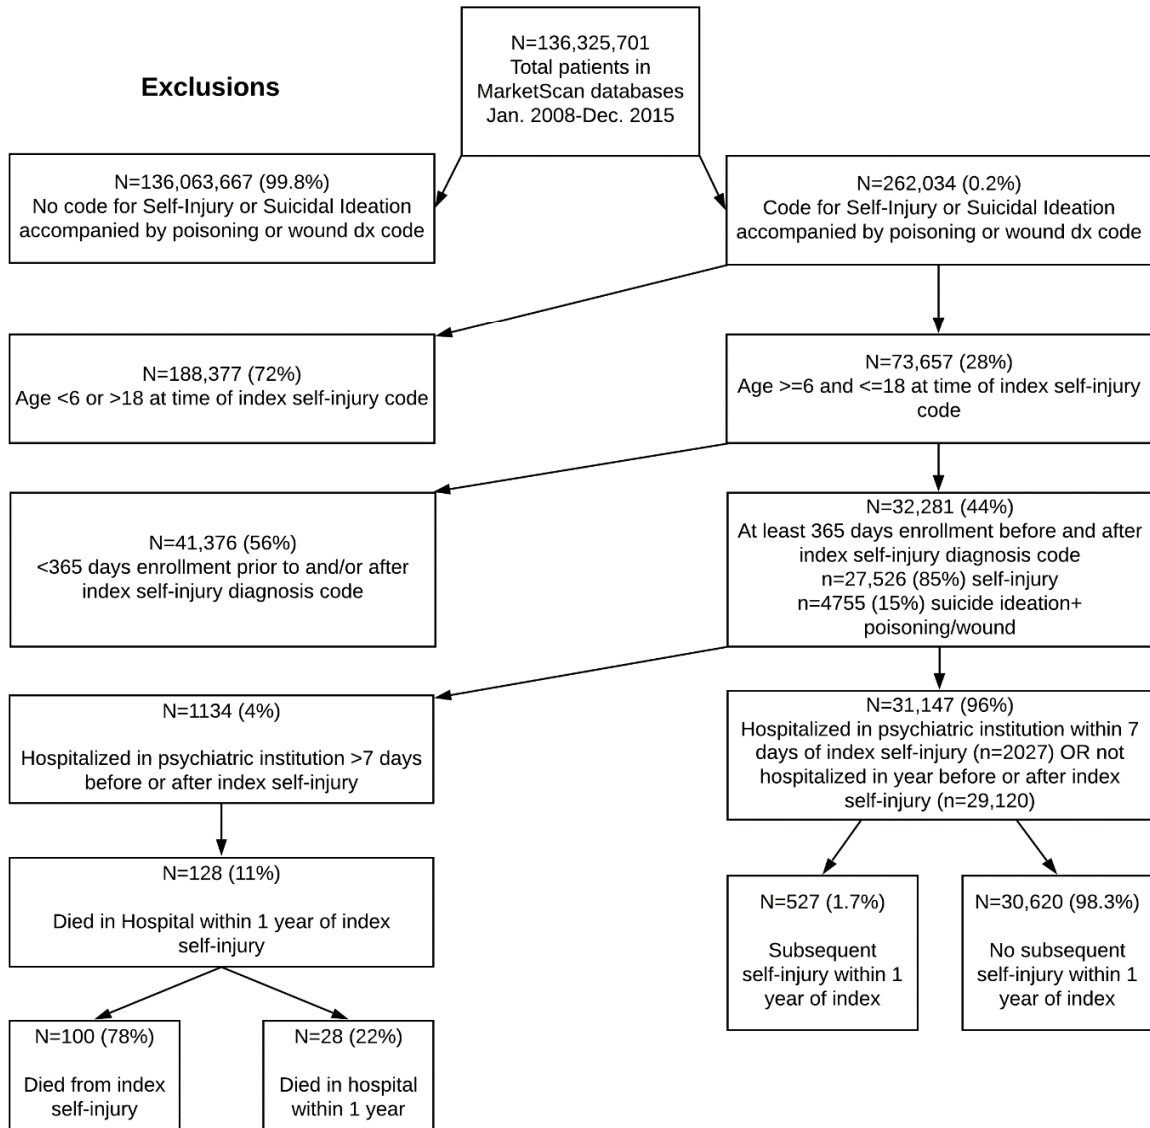

### Cumulative Hazard Curve

Subsequent Self-Injury Stratified by Hospitalization in Psych Hospital >7 Days After Index

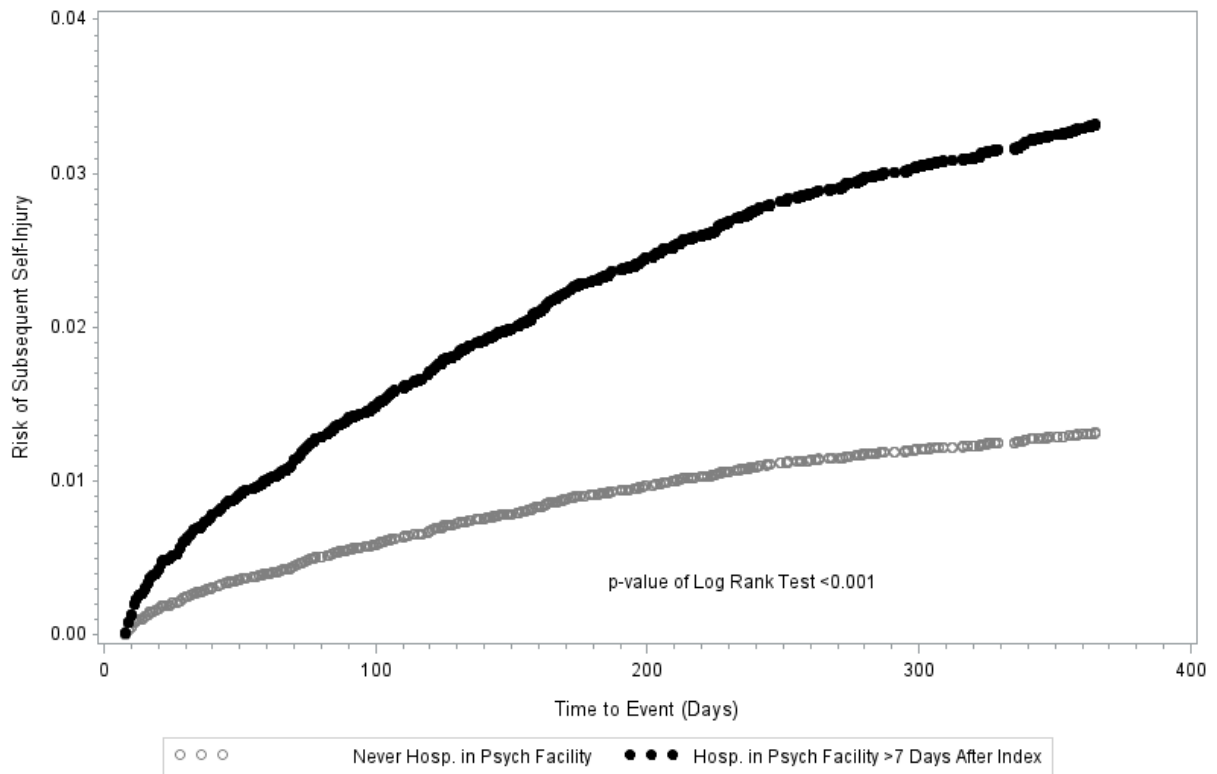

Cumulative Hazard Curve showing risk of subsequent self-injury in 365 days following index, stratified by whether the patient had at least 1 inpatient hospitalization in a psychiatric facility **at any time** during the year prior to and the year after the index event. Adjusted for patient age (continuous), sex, region of residence, health insurance plan type, calendar year of index, and psychiatric disorders summary score.

Characteristics of Patients Medically Treatment for Self-injuries from 2008-2015 and their hospitalization at any time status.

| Characteristics                                             | No hospitalization in psychiatric facility<br>n= 29,120 |       | Hospitalization in psychiatric facility at any time<br>n = 3161 |       | P value |
|-------------------------------------------------------------|---------------------------------------------------------|-------|-----------------------------------------------------------------|-------|---------|
|                                                             | Mean                                                    | SD    | Mean                                                            | SD    |         |
| Age (years)                                                 | 14.1                                                    | ± 3.1 | 15.4                                                            | ± 1.7 | <0.0001 |
| Age (years)                                                 | N                                                       | Row % | N                                                               | Row % |         |
| 6-11                                                        | 5768                                                    | 99    | 43                                                              | 1     |         |
| 12-14                                                       | 4293                                                    | 92    | 375                                                             | 8     | <0.0001 |
| 15-18                                                       | 19,059                                                  | 87    | 2743                                                            | 13    |         |
| Gender                                                      |                                                         |       |                                                                 |       |         |
| Male                                                        | 13,386                                                  | 93    | 948                                                             | 7     |         |
| Female                                                      | 15,734                                                  | 88    | 2213                                                            | 12    | <0.0001 |
| Type of health plan                                         |                                                         |       |                                                                 |       |         |
| Comprehensive                                               | 217                                                     | 94    | 14                                                              | 6     |         |
| Exclusive/Preferred provider org.                           | 19,309                                                  | 91    | 1974                                                            | 9     |         |
| Health maintenance organization                             | 2681                                                    | 88    | 352                                                             | 12    | <0.0001 |
| Point of service                                            | 1616                                                    | 89    | 192                                                             | 11    |         |
| Consumer-directed/High-deductible                           | 5079                                                    | 90    | 577                                                             | 10    |         |
| Missing                                                     | 218                                                     |       | 52                                                              |       |         |
| Geographic region                                           |                                                         |       |                                                                 |       |         |
| Northeast                                                   | 4807                                                    | 95    | 227                                                             | 5     |         |
| North Central                                               | 7876                                                    | 90    | 882                                                             | 10    | <0.0001 |
| South                                                       | 10,203                                                  | 90    | 1107                                                            | 10    |         |
| West                                                        | 6084                                                    | 87    | 943                                                             | 13    |         |
| Missing                                                     | 150                                                     |       | 2                                                               |       |         |
| Year of index self-injury                                   |                                                         |       |                                                                 |       |         |
| 2008                                                        | 1297                                                    | 94    | 90                                                              | 6     |         |
| 2009                                                        | 2182                                                    | 92    | 186                                                             | 8     |         |
| 2010                                                        | 2688                                                    | 94    | 173                                                             | 6     | <0.0001 |
| 2011                                                        | 4234                                                    | 94    | 264                                                             | 6     |         |
| 2012                                                        | 3576                                                    | 91    | 364                                                             | 9     |         |
| 2013                                                        | 4210                                                    | 88    | 584                                                             | 12    |         |
| 2014                                                        | 4604                                                    | 88    | 652                                                             | 12    |         |
| 2015                                                        | 6329                                                    | 88    | 848                                                             | 12    |         |
| Mental health assessment performed during index self-injury | 145                                                     | 73%   | 54                                                              | 27%   | <0.0001 |

Diagnoses in the year prior to the index self-injury stratified by whether the patient was hospitalized at **any time** in a psychiatric facility.

| Dxs in the year prior to index self-injury  | No hospitalization in psychiatric facility<br>n= 29,120 |            | Hospitalization in psychiatric facility at any time<br>n = 3161 |           | P value           |
|---------------------------------------------|---------------------------------------------------------|------------|-----------------------------------------------------------------|-----------|-------------------|
|                                             | N                                                       | Column %   | N                                                               | Column %  |                   |
| Disruptive Mood Dysregulation Dis.          | 144                                                     | 0.5        | 66                                                              | 2.1       | <0.0001           |
| Major Depressive Dis.                       | 3866                                                    | 13         | 1469                                                            | 46        | <0.0001           |
| Persistent Depressive Dis. (Dysthymia)      | 1042                                                    | 3.6        | 346                                                             | 11        | <0.0001           |
| Pre-Menstrual Dysphoric Dis.                | 70                                                      | 0.2        | 30                                                              | 0.9       | <0.0001           |
| Depressive Dis. due to Med. Condition       | 134                                                     | 0.5        | 52                                                              | 1.6       | <0.0001           |
| Other Specified/Unspecified                 | 4694                                                    | 16         | 1543                                                            | 49        | <0.0001           |
| <b>Any unipolar mood disorder</b>           | <b>6541</b>                                             | <b>22</b>  | <b>2080</b>                                                     | <b>66</b> | <b>&lt;0.0001</b> |
| Bipolar I                                   | 490                                                     | 1.7        | 231                                                             | 7.3       | <0.0001           |
| Bipolar II                                  | 282                                                     | 1          | 127                                                             | 4         | <0.0001           |
| Cyclothymic Disorder                        | 23                                                      | 0.08       | 6                                                               | 0.2       | <0.0001           |
| Bipolar due to Med. Condition               | 133                                                     | 0.5        | 51                                                              | 1.6       | <0.0001           |
| Other Specified/Unspecified                 | 6                                                       | .02        | 1                                                               | 0.03      | 0.37              |
| <b>Any bipolar mood disorder</b>            | <b>836</b>                                              | <b>2.9</b> | <b>366</b>                                                      | <b>12</b> | <b>&lt;0.0001</b> |
| Delusional Dis.                             | 17                                                      | 0.06       | 9                                                               | 0.3       | <0.0001           |
| Brief Psychotic Dis.                        | 117                                                     | 0.40       | 76                                                              | 2.4       | <0.0001           |
| Schizophreniform Dis.                       | 10                                                      | 0.03       | 7                                                               | 0.2       | <0.0001           |
| Schizophrenia                               | 41                                                      | 0.1        | 22                                                              | 0.7       | <0.0001           |
| Schizoaffective Dis. (Bipolar & Depressive) | 54                                                      | 0.2        | 35                                                              | 1.1       | <0.0001           |
| Psychotic Dis. due to Med. Condition        | 9                                                       | 0.03       | 1                                                               | 0.03      | 0.39              |
| Other Specified/Unspecified                 | 751                                                     | 2.6        | 354                                                             | 11        | <0.0001           |
| <b>Any psychotic disorder</b>               | <b>806</b>                                              | <b>2.8</b> | <b>385</b>                                                      | <b>12</b> | <b>&lt;0.0001</b> |
| Conduct Disorder                            | 51                                                      | 0.2        | 23                                                              | 0.7       | <0.0001           |
| Disruptive Behavior Disorder                | 599                                                     | 2.1        | 172                                                             | 5.4       | <0.0001           |
| ODD                                         | 900                                                     | 3.1        | 313                                                             | 9.9       | <0.0001           |
| ADHD                                        | 3589                                                    | 12         | 703                                                             | 22        | <0.0001           |
| <b>Any behavior disorder</b>                | <b>4335</b>                                             | <b>15</b>  | <b>955</b>                                                      | <b>30</b> | <b>&lt;0.0001</b> |
| Generalized Anxiety Disorder (GAD)          | 1543                                                    | 5.3        | 536                                                             | 17        | <0.0001           |
| Panic Disorders                             | 413                                                     | 1.4        | 162                                                             | 5.1       | <0.0001           |
| Obsessive Compulsive Disorder (OCD)         | 325                                                     | 1.1        | 110                                                             | 3.5       | <0.0001           |
| Post-Traumatic Stress Disorder (PTSD)       | 569                                                     | 2.0        | 256                                                             | 8.1       | <0.0001           |
| Acute Stress Disorder                       | 50                                                      | 0.2        | 10                                                              | 0.3       | 0.07              |
| Phobias                                     | 306                                                     | 1.1        | 111                                                             | 3.5       | <0.0001           |
| Separation Anxiety                          | 32                                                      | 0.1        | 4                                                               | 0.1       | 0.79              |
| Adjustment Disorder                         | 63                                                      | 0.2        | 24                                                              | 0.8       | <0.0001           |
| <b>Any anxiety disorder</b>                 | <b>2628</b>                                             | <b>9.0</b> | <b>892</b>                                                      | <b>28</b> | <b>&lt;0.0001</b> |

| <b>Summary score of disorder diagnoses</b> |               |            |            |            |                   |
|--------------------------------------------|---------------|------------|------------|------------|-------------------|
| <b>0</b>                                   | <b>19,592</b> | <b>67</b>  | <b>747</b> | <b>24</b>  |                   |
| <b>1</b>                                   | <b>5526</b>   | <b>19</b>  | <b>944</b> | <b>30</b>  |                   |
| <b>2</b>                                   | <b>2724</b>   | <b>9.4</b> | <b>869</b> | <b>27</b>  | <b>&lt;0.0001</b> |
| <b>3</b>                                   | <b>979</b>    | <b>3.4</b> | <b>438</b> | <b>14</b>  |                   |
| <b>4</b>                                   | <b>260</b>    | <b>0.9</b> | <b>133</b> | <b>4.2</b> |                   |
| <b>5</b>                                   | <b>39</b>     | <b>0.1</b> | <b>30</b>  | <b>1.0</b> |                   |

Patient services utilization during the 12 months before and after index self-injury event. Stratified by hospitalization in psychiatric facility **at any time**.

| Characteristics                                                                                                             | No hospitalization in psychiatric facility at any time<br>N = 29,120 | Hospitalization in psychiatric facility at any time<br>N = 3161 | P-value           |
|-----------------------------------------------------------------------------------------------------------------------------|----------------------------------------------------------------------|-----------------------------------------------------------------|-------------------|
| <i>12 months PRIOR TO index self-injury healthcare utilization</i>                                                          |                                                                      |                                                                 |                   |
| <b>Inpatient claims</b>                                                                                                     |                                                                      |                                                                 |                   |
| ≥1 <b>Inpatient hospitalization</b> (any location) N (%)                                                                    | <b>2820 (10)</b>                                                     | <b>1238 (39)</b>                                                | <b>&lt;0.0001</b> |
| Among those with ≥1 # of <b>Inpatient hospitalizations</b> (unique admissions, any location) Mean (SD)                      | <b>1.6 (± 1.2)</b>                                                   | <b>1.8 (± 1.3)</b>                                              | <b>&lt;0.0001</b> |
| <b>ER claims</b>                                                                                                            |                                                                      |                                                                 |                   |
| ≥1 ER visit N (%)                                                                                                           | <b>9745 (33)</b>                                                     | <b>1621 (33)</b>                                                | <b>&lt;0.0001</b> |
| Among those with ≥1, ER visits (unique days) Mean (SD)                                                                      | <b>1.9 (± 1.8)</b>                                                   | <b>2.4 (± 2.6)</b>                                              | <b>&lt;0.0001</b> |
| <b>Outpatient claims</b>                                                                                                    |                                                                      |                                                                 |                   |
| ≥1 outpatient visit ( <b>any psych facility location</b> ) N (%)                                                            | <b>549 (2)</b>                                                       | <b>506 (16)</b>                                                 | <b>&lt;0.0001</b> |
| Among those with ≥1, # of <b>outpatient visits</b> (unique dates of service, <b>any psych facility location</b> ) Mean (SD) | 8.2 (± 10.7)                                                         | 7.3 (± 10.1)                                                    | 0.15              |
| ≥1 outpatient visit at <b>any type of facility</b> N (%)                                                                    | <b>27246 (94)</b>                                                    | <b>3055 (97)</b>                                                | <b>&lt;0.0001</b> |
| # of outpatient visits (unique dates of service) at <b>any type of facility</b> Mean (SD)                                   | <b>10.5 (± 14.6)</b>                                                 | <b>19.4 (± 20.4)</b>                                            | <b>&lt;0.0001</b> |
| ≥1 <b>All-indication medication filled</b> N (%)                                                                            | <b>18,160 (62)</b>                                                   | <b>2413 (76)</b>                                                | <b>&lt;0.0001</b> |
| Among those with ≥1, # of all-indication medications filled Mean (SD)                                                       | <b>10.0 (± 12.3)</b>                                                 | <b>17.1 (± 17.8)</b>                                            | <b>&lt;0.0001</b> |
| <i>12 months after index self-injury healthcare utilization</i>                                                             |                                                                      |                                                                 |                   |
| <b>Inpatient claims</b>                                                                                                     |                                                                      |                                                                 |                   |
| ≥1 <b>Inpatient hospitalization</b> (any location) N (%)                                                                    | <b>3066 (11)</b>                                                     | <b>1377 (44)</b>                                                | <b>&lt;0.0001</b> |
| Among those with ≥1 # of <b>Inpatient hospitalizations</b> (unique admissions, any location) Mean (SD)                      | <b>0.11 (± 0.31)</b>                                                 | <b>0.44 (± 0.50)</b>                                            | <b>&lt;0.0001</b> |
| <b>ER claims</b>                                                                                                            |                                                                      |                                                                 |                   |
| ≥1 ER visit N (%)                                                                                                           | <b>10,058 (35)</b>                                                   | <b>1861 (59)</b>                                                | <b>&lt;0.0001</b> |
| Among those with ≥1, ER visits (unique days) Mean (SD)                                                                      | <b>2.1 (± 2.5)</b>                                                   | <b>2.8 (± 2.9)</b>                                              | <b>&lt;0.0001</b> |
| <b>Outpatient claims</b>                                                                                                    |                                                                      |                                                                 |                   |
| ≥1 outpatient visit ( <b>any psych facility location</b> ) N (%)                                                            | <b>960 (3)</b>                                                       | <b>844 (27)</b>                                                 | <b>&lt;0.0001</b> |
| Among those with ≥1, # of <b>outpatient visits</b> (unique dates of service, <b>any psych facility location</b> ) Mean (SD) | 8.9 (± 12)                                                           | 8.0 (± 11)                                                      | 0.09              |
| ≥1 outpatient visit at <b>any type of facility</b> N (%)                                                                    | <b>27,755 (95)</b>                                                   | <b>3104 (98)</b>                                                | <b>&lt;0.0001</b> |
| # of outpatient visits (unique dates of service) at <b>any type of facility</b> Mean (SD)                                   | <b>14.4 (± 18.5)</b>                                                 | <b>28.0 (± 24.3)</b>                                            | <b>&lt;0.0001</b> |
| ≥1 <b>All-indication medication filled</b> N (%)                                                                            | <b>19,003 (65)</b>                                                   | <b>2625 (83)</b>                                                | <b>&lt;0.0001</b> |
| Among those with ≥1, # of all-indication medications filled Mean (SD)                                                       | <b>13.1 (± 15)</b>                                                   | <b>25 (± 20)</b>                                                | <b>&lt;0.0001</b> |
| <b>Subsequent self-injury (yes/no)</b> N (%)                                                                                | <b>417 (1.4)</b>                                                     | <b>263 (8.3)</b>                                                | <b>&lt;0.0001</b> |

|                                                         |                          |                         |      |
|---------------------------------------------------------|--------------------------|-------------------------|------|
| Median time to subsequent self-injury Mean (SD [range]) | 117 ( $\pm$ 101 (8-365)) | 110 ( $\pm$ 97 (8-361)) | 0.76 |
|---------------------------------------------------------|--------------------------|-------------------------|------|

Hazard ratios and 95% confidence intervals of risk of subsequent self-injury in 365 days following index self-injury.

| Variable                                                                             | Hazard Ratio | 95% CI     | p-value |
|--------------------------------------------------------------------------------------|--------------|------------|---------|
| <b>Hospitalization in psychiatric hospital at any time</b>                           | 3.28         | 2.76, 3.88 | <0.0001 |
| <b>Age</b>                                                                           | 1.05         | 1.02, 1.09 | 0.004   |
| <b>Male</b>                                                                          | 0.66         | 0.56, 0.78 | <0.0001 |
| <b>Health Insurance Type</b>                                                         |              |            |         |
| Consumer Directed/High Deductible                                                    | Referent     |            |         |
| Comprehensive Insurance                                                              | 0.53         | 0.17, 1.68 | 0.28    |
| Exclusive/Preferred Provider Org.                                                    | 0.90         | 0.74, 1.09 | 0.29    |
| Health Maintenance Org.                                                              | 1.01         | 0.76, 1.35 | 0.95    |
| Point of Service                                                                     | 0.85         | 0.58, 1.24 | 0.39    |
| <b>Region</b>                                                                        |              |            |         |
| West                                                                                 | Referent     |            |         |
| Northeast                                                                            | 1.06         | 0.82, 1.36 | 0.65    |
| North Central                                                                        | 1.14         | 0.93, 1.39 | 0.22    |
| South                                                                                | 0.84         | 0.68, 1.04 | 0.11    |
| <b>Year of Index Self-injury</b>                                                     |              |            |         |
| 2008                                                                                 | Referent     |            |         |
| 2009                                                                                 | 1.85         | 0.95, 3.61 | 0.07    |
| 2010                                                                                 | 2.22         | 1.16, 4.26 | 0.02    |
| 2011                                                                                 | 1.97         | 1.04, 3.72 | 0.04    |
| 2012                                                                                 | 2.55         | 1.36, 4.77 | 0.003   |
| 2013                                                                                 | 2.45         | 1.32, 4.55 | 0.005   |
| 2014                                                                                 | 2.54         | 1.37, 4.69 | 0.003   |
| 2015                                                                                 | 1.97         | 1.07, 3.65 | 0.03    |
| <b>Number of Unique Categories of Mood Disorder Diagnoses in Year Prior to Index</b> |              |            |         |
| 0                                                                                    | Referent     |            |         |
| 1                                                                                    | 2.47         | 2.00, 3.05 | <0.0001 |
| 2                                                                                    | 3.44         | 2.76, 4.30 | <0.0001 |
| 3                                                                                    | 4.72         | 3.65, 6.11 | <0.0001 |
| 4                                                                                    | 4.12         | 2.71, 6.25 | <0.0001 |
| 5                                                                                    | 3.14         | 1.16, 8.51 | 0.02    |



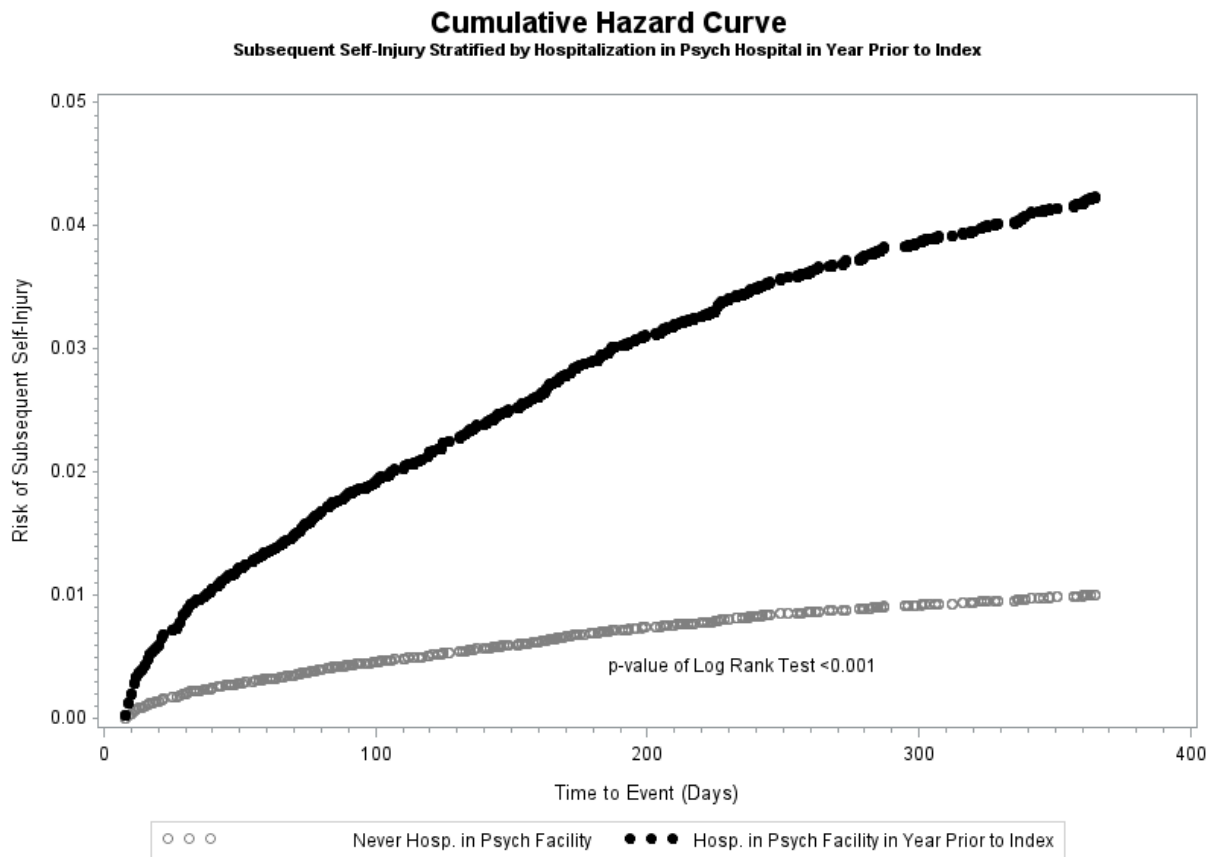

Cumulative Hazard Curve showing risk of subsequent self-injury in 365 days following index self-injury, stratified by whether the patient had at least 1 inpatient hospitalization in a psychiatric facility **in the year prior to the index event**. Adjusted for patient age (continuous), sex, region of residence, health insurance plan type, calendar year of index self-injury, and psychiatric disorders summary score.

Characteristics of Patients Medically Treatment for Self-injuries from 2008-2015 and their hospitalization status **in the year prior the index self-injury event.**

| Characteristics                                             | No hospitalization in psychiatric facility<br>n= 29,120 |              | Hospitalization in psychiatric facility in the year prior to index self-injury event<br>n = 941 |              | P value           |
|-------------------------------------------------------------|---------------------------------------------------------|--------------|-------------------------------------------------------------------------------------------------|--------------|-------------------|
|                                                             | Mean                                                    | SD           | Mean                                                                                            | SD           |                   |
| Age (years)                                                 | <b>14.1</b>                                             | <b>± 3.1</b> | <b>15.5</b>                                                                                     | <b>± 1.7</b> | <b>&lt;0.0001</b> |
| Age (years)                                                 | N                                                       | Row %        | N                                                                                               | Row %        |                   |
| 6-11                                                        | <b>5768</b>                                             | <b>99</b>    | <b>10</b>                                                                                       | <b>0.2</b>   |                   |
| 12-14                                                       | <b>4293</b>                                             | <b>98</b>    | <b>4293</b>                                                                                     | <b>2</b>     | <b>&lt;0.0001</b> |
| 15-18                                                       | <b>19,059</b>                                           | <b>96</b>    | <b>19,059</b>                                                                                   | <b>4</b>     |                   |
| Gender                                                      |                                                         |              |                                                                                                 |              |                   |
| Male                                                        | <b>13,386</b>                                           | <b>98</b>    | <b>327</b>                                                                                      | <b>2</b>     |                   |
| Female                                                      | <b>15,734</b>                                           | <b>96</b>    | <b>614</b>                                                                                      | <b>4</b>     | <b>&lt;0.0001</b> |
| Type of health plan                                         |                                                         |              |                                                                                                 |              |                   |
| Comprehensive                                               | <b>217</b>                                              | <b>97</b>    | <b>6</b>                                                                                        | <b>3</b>     |                   |
| Exclusive/Preferred provider org.                           | <b>19,309</b>                                           | <b>97</b>    | <b>583</b>                                                                                      | <b>4</b>     |                   |
| Health maintenance organization                             | <b>2681</b>                                             | <b>96</b>    | <b>112</b>                                                                                      | <b>4</b>     | <b>0.004</b>      |
| Point of service                                            | <b>1616</b>                                             | <b>96</b>    | <b>59</b>                                                                                       | <b>3</b>     |                   |
| Consumer-directed/High-deductible                           | <b>5079</b>                                             | <b>97</b>    | <b>167</b>                                                                                      | <b>6</b>     |                   |
| Missing                                                     | <b>218</b>                                              |              | <b>14</b>                                                                                       |              |                   |
| Geographic region                                           |                                                         |              |                                                                                                 |              |                   |
| Northeast                                                   | <b>4807</b>                                             | <b>95</b>    | <b>73</b>                                                                                       | <b>2</b>     |                   |
| North Central                                               | <b>7876</b>                                             | <b>90</b>    | <b>285</b>                                                                                      | <b>3</b>     |                   |
| South                                                       | <b>10,203</b>                                           | <b>90</b>    | <b>319</b>                                                                                      | <b>3</b>     | <b>&lt;0.0001</b> |
| West                                                        | <b>6084</b>                                             | <b>87</b>    | <b>264</b>                                                                                      | <b>4</b>     |                   |
| Missing                                                     | <b>150</b>                                              |              | <b>0</b>                                                                                        |              |                   |
| Year of index self-injury                                   |                                                         |              |                                                                                                 |              |                   |
| 2008                                                        | <b>1297</b>                                             | <b>98</b>    | <b>28</b>                                                                                       | <b>2</b>     |                   |
| 2009                                                        | <b>2182</b>                                             | <b>97</b>    | <b>58</b>                                                                                       | <b>3</b>     |                   |
| 2010                                                        | <b>2688</b>                                             | <b>98</b>    | <b>66</b>                                                                                       | <b>2</b>     |                   |
| 2011                                                        | <b>4234</b>                                             | <b>98</b>    | <b>80</b>                                                                                       | <b>2</b>     |                   |
| 2012                                                        | <b>3576</b>                                             | <b>96</b>    | <b>81</b>                                                                                       | <b>2</b>     | <b>&lt;0.0001</b> |
| 2013                                                        | <b>4210</b>                                             | <b>96</b>    | <b>170</b>                                                                                      | <b>4</b>     |                   |
| 2014                                                        | <b>4604</b>                                             | <b>96</b>    | <b>199</b>                                                                                      | <b>4</b>     |                   |
| 2015                                                        | <b>6329</b>                                             | <b>96</b>    | <b>259</b>                                                                                      | <b>4</b>     |                   |
| Mental health assessment performed during index self-injury | <b>145</b>                                              | <b>92</b>    | <b>12</b>                                                                                       | <b>8</b>     | <b>0.001</b>      |

Diagnoses in the year prior to the index self-injury stratified by whether the patient was hospitalized in a psychiatric facility **in the year prior to index self-injury event.**

| Dxs in the year prior to index self-injury  | No hospitalization in psychiatric facility<br>n= 29,120 |            | Hospitalization in psychiatric facility in year prior to index<br>n = 941 |           | P value           |
|---------------------------------------------|---------------------------------------------------------|------------|---------------------------------------------------------------------------|-----------|-------------------|
|                                             | N                                                       | Column %   | N                                                                         | Column %  |                   |
| Disruptive Mood Dysregulation Dis.          | 144                                                     | 0.5        | 42                                                                        | 4         | <0.0001           |
| Major Depressive Dis.                       | 3866                                                    | 13         | 757                                                                       | 80        | <0.0001           |
| Persistent Depressive Dis. (Dysthymia)      | 1042                                                    | 3.6        | 156                                                                       | 17        | <0.0001           |
| Pre-Menstrual Dysphoric Dis.                | 70                                                      | 0.2        | 11                                                                        | 1         | <0.0001           |
| Depressive Dis. due to Med. Condition       | 134                                                     | 0.5        | 31                                                                        | 3         | <0.0001           |
| Other Specified/Unspecified                 | 4694                                                    | 16         | 682                                                                       | 72        | <0.0001           |
| <b>Any unipolar mood disorder</b>           | <b>6541</b>                                             | <b>22</b>  | <b>869</b>                                                                | <b>92</b> | <b>&lt;0.0001</b> |
| Bipolar I                                   | 490                                                     | 1.7        | 158                                                                       | 17        | <0.0001           |
| Bipolar II                                  | 282                                                     | 1          | 78                                                                        | 8         | <0.0001           |
| Cyclothymic Disorder                        | 23                                                      | 0.08       | 2                                                                         | 0.2       | 0.18              |
| Bipolar due to Med. Condition               | 133                                                     | 0.5        | 31                                                                        | 3         | <0.0001           |
| Other Specified/Unspecified                 | 6                                                       | .02        | 1                                                                         | 0.1       | 0.09              |
| <b>Any bipolar mood disorder</b>            | <b>836</b>                                              | <b>2.9</b> | <b>231</b>                                                                | <b>25</b> | <b>&lt;0.0001</b> |
| Delusional Dis.                             | 17                                                      | 0.06       | 6                                                                         | 0.6       | <0.0001           |
| Brief Psychotic Dis.                        | 117                                                     | 0.40       | 58                                                                        | 6         | <0.0001           |
| Schizophreniform Dis.                       | 10                                                      | 0.03       | 4                                                                         | 0.4       | <0.0001           |
| Schizophrenia                               | 41                                                      | 0.1        | 11                                                                        | 1         | <0.0001           |
| Schizoaffective Dis. (Bipolar & Depressive) | 54                                                      | 0.2        | 23                                                                        | 2         | <0.0001           |
| Psychotic Dis. due to Med. Condition        | 9                                                       | 0.03       | 1                                                                         | 0.1       | 0.27              |
| Other Specified/Unspecified                 | 751                                                     | 2.6        | 242                                                                       | 26        | <0.0001           |
| <b>Any psychotic disorder</b>               | <b>806</b>                                              | <b>2.8</b> | <b>256</b>                                                                | <b>27</b> | <b>&lt;0.0001</b> |
| Conduct Disorder                            | 51                                                      | 0.2        | 14                                                                        | 1         | <0.0001           |
| Disruptive Behavior Disorder                | 599                                                     | 2.1        | 98                                                                        | 10        | <0.0001           |
| ODD                                         | 900                                                     | 3.1        | 179                                                                       | 19        | <0.0001           |
| ADHD                                        | 3589                                                    | 12         | 302                                                                       | 32        | <0.0001           |
| <b>Any behavior disorder</b>                | <b>4335</b>                                             | <b>15</b>  | <b>432</b>                                                                | <b>46</b> | <b>&lt;0.0001</b> |
| Generalized Anxiety Disorder (GAD)          | 1543                                                    | 5.3        | 276                                                                       | 29        | <0.0001           |
| Panic Disorders                             | 413                                                     | 1.4        | 87                                                                        | 9         | <0.0001           |
| Obsessive Compulsive Disorder (OCD)         | 325                                                     | 1.1        | 59                                                                        | 6         | <0.0001           |
| Post-Traumatic Stress Disorder (PTSD)       | 569                                                     | 2.0        | 153                                                                       | 16        | <0.0001           |
| Acute Stress Disorder                       | 50                                                      | 0.2        | 4                                                                         | 0.4       | 0.09              |
| Phobias                                     | 306                                                     | 1.1        | 59                                                                        | 6         | <0.0001           |
| Separation Anxiety                          | 32                                                      | 0.1        | 0                                                                         | 0         | 0.63              |
| Adjustment Disorder                         | 63                                                      | 0.2        | 8                                                                         | 0.9       | <0.0001           |
| <b>Any anxiety disorder</b>                 | <b>2628</b>                                             | <b>9.0</b> | <b>446</b>                                                                | <b>47</b> | <b>&lt;0.0001</b> |

| <b>Summary score of disorder diagnoses</b> |               |            |            |           |                   |
|--------------------------------------------|---------------|------------|------------|-----------|-------------------|
| <b>0</b>                                   | <b>19,592</b> | <b>67</b>  | <b>11</b>  | <b>1</b>  |                   |
| <b>1</b>                                   | <b>5526</b>   | <b>19</b>  | <b>178</b> | <b>19</b> |                   |
| <b>2</b>                                   | <b>2724</b>   | <b>9.4</b> | <b>355</b> | <b>38</b> |                   |
| <b>3</b>                                   | <b>979</b>    | <b>3.4</b> | <b>270</b> | <b>29</b> | <b>&lt;0.0001</b> |
| <b>4</b>                                   | <b>260</b>    | <b>0.9</b> | <b>99</b>  | <b>11</b> |                   |
| <b>5</b>                                   | <b>39</b>     | <b>0.1</b> | <b>28</b>  | <b>3</b>  |                   |

Patient services utilization during the 12 months before and after index self-injury event. Stratified by **hospitalization in psychiatric hospital in year prior to index self-injury.**

| Characteristics                                                                                                             | No hospitalization in psychiatric facility<br>N = 29,120 | Hospitalization in psychiatric facility in year prior to index<br>N = 941 | P-value           |
|-----------------------------------------------------------------------------------------------------------------------------|----------------------------------------------------------|---------------------------------------------------------------------------|-------------------|
| <i>12 months PRIOR TO index self-injury healthcare utilization</i>                                                          |                                                          |                                                                           |                   |
| <b>Inpatient claims</b>                                                                                                     |                                                          |                                                                           |                   |
| ≥1 <b>Inpatient hospitalization</b> (any location) N (%)                                                                    | <b>2820 (10)</b>                                         | <b>941</b>                                                                | <b>&lt;0.0001</b> |
| Among those with ≥1 # of <b>Inpatient hospitalizations</b> (unique admissions, any location) Mean (SD)                      | <b>1.6 (± 1.2)</b>                                       | <b>1.9 (±1.3)</b>                                                         | <b>&lt;0.0001</b> |
| <b>ER claims</b>                                                                                                            |                                                          |                                                                           |                   |
| ≥1 ER visit N (%)                                                                                                           | <b>9745 (33)</b>                                         | <b>728 (77)</b>                                                           | <b>&lt;0.0001</b> |
| Among those with ≥1, ER visits (unique days) Mean (SD)                                                                      | <b>1.9 (± 1.8)</b>                                       | <b>2.7 (± 2.4)</b>                                                        | <b>&lt;0.0001</b> |
| <b>Outpatient claims</b>                                                                                                    |                                                          |                                                                           |                   |
| ≥1 outpatient visit ( <b>any psych facility location</b> ) N (%)                                                            | <b>549 (2)</b>                                           | <b>370 (39)</b>                                                           | <b>&lt;0.0001</b> |
| Among those with ≥1, # of <b>outpatient visits</b> (unique dates of service, <b>any psych facility location</b> ) Mean (SD) | 8.2 (± 10.7)                                             | 7.6 (± 11.0)                                                              | 0.39              |
| ≥1 outpatient visit at <b>any type of facility</b> N (%)                                                                    | <b>27,246 (94)</b>                                       | <b>938 (100)</b>                                                          | <b>&lt;0.0001</b> |
| # of outpatient visits (unique dates of service) at <b>any type of facility</b> Mean (SD)                                   | <b>10.5 (± 14.6)</b>                                     | <b>29.7 (± 24.5)</b>                                                      | <b>&lt;0.0001</b> |
| ≥1 <b>All-indication medication filled</b> N (%)                                                                            | <b>18,160 (62)</b>                                       | <b>817 (87)</b>                                                           | <b>&lt;0.0001</b> |
| Among those with ≥1, # of all-indication medications filled Mean (SD)                                                       | <b>10.0 (± 12.3)</b>                                     | <b>22.3 (±19.7)</b>                                                       | <b>&lt;0.0001</b> |
| <i>12 months after index self-injury healthcare utilization</i>                                                             |                                                          |                                                                           |                   |
| <b>Inpatient claims</b>                                                                                                     |                                                          |                                                                           |                   |
| ≥1 <b>Inpatient hospitalization</b> (any location) N (%)                                                                    | <b>3066 (11)</b>                                         | <b>425 (45)</b>                                                           | <b>&lt;0.0001</b> |
| Among those with ≥1 # of <b>Inpatient hospitalizations</b> (unique admissions, any location) Mean (SD)                      | <b>1.7 (±1.4)</b>                                        | <b>2.2 (± 2.3)</b>                                                        | <b>&lt;0.0001</b> |
| <b>ER claims</b>                                                                                                            |                                                          |                                                                           |                   |
| ≥1 ER visit N (%)                                                                                                           | <b>10,058 (35)</b>                                       | <b>592 (63)</b>                                                           | <b>&lt;0.0001</b> |
| Among those with ≥1, ER visits (unique days) Mean (SD)                                                                      | <b>2.1 (± 2.5)</b>                                       | <b>3.0 (±3.6)</b>                                                         | <b>&lt;0.0001</b> |
| <b>Outpatient claims</b>                                                                                                    |                                                          |                                                                           |                   |
| ≥1 outpatient visit ( <b>any psych facility location</b> ) N (%)                                                            | <b>960 (3)</b>                                           | <b>264 (28)</b>                                                           | <b>&lt;0.0001</b> |
| Among those with ≥1, # of <b>outpatient visits</b> (unique dates of service, <b>any psych facility location</b> ) Mean (SD) | 8.9 (± 12)                                               | 10.1 (±13.0)                                                              | 0.17              |
| ≥1 outpatient visit at <b>any type of facility</b> N (%)                                                                    | <b>27,755 (95)</b>                                       | <b>929 (99)</b>                                                           | <b>&lt;0.0001</b> |
| # of outpatient visits (unique dates of service) at <b>any type of facility</b> Mean (SD)                                   | <b>14.4 (± 18.5)</b>                                     | <b>31.7 (± 29.9)</b>                                                      | <b>&lt;0.0001</b> |
| ≥1 <b>All-indication medication filled</b> N (%)                                                                            | <b>19,003 (65)</b>                                       | <b>821 (87)</b>                                                           | <b>&lt;0.0001</b> |
| Among those with ≥1, # of all-indication medications filled Mean (SD)                                                       | <b>13.1 (± 15)</b>                                       | <b>28.4 (± 21.1)</b>                                                      | <b>&lt;0.0001</b> |
| <b>Subsequent self-injury (yes/no)</b> N (%)                                                                                | <b>417 (1.4)</b>                                         | <b>68 (7.2)</b>                                                           | <b>&lt;0.0001</b> |
| Median time to subsequent self-injury (SD [range])                                                                          | 117 (± 101 (8-365))                                      | 117 (± 104 (8-361))                                                       | 0.40              |



Hazard ratios and 95% confidence intervals of risk of subsequent self-injury in 365 days following index self-injury.

| Variable                                                                             | Hazard Ratio | 95% CI      | p-value |
|--------------------------------------------------------------------------------------|--------------|-------------|---------|
| <b>Hospitalization in psychiatric hospital in year prior to index</b>                | 1.78         | 1.34, 2.35  | <0.0001 |
| <b>Age</b>                                                                           | 1.04         | 1.00, 1.08  | 0.03    |
| <b>Male</b>                                                                          | 0.66         | 0.54, 0.80  | <0.0001 |
| <b>Health Insurance Type</b>                                                         |              |             |         |
| Consumer Directed/High Deductible                                                    | Referent     |             |         |
| Comprehensive Insurance                                                              | 0.63         | 0.20, 1.98  | 0.42    |
| Exclusive/Preferred Provider Org.                                                    | 0.86         | 0.68, 1.09  | 0.22    |
| Health Maintenance Org.                                                              | 1.11         | 0.79, 1.54  | 0.56    |
| Point of Service                                                                     | 0.81         | 0.52, 1.28  | 0.37    |
| <b>Region</b>                                                                        |              |             |         |
| West                                                                                 | Referent     |             |         |
| Northeast                                                                            | 1.12         | 0.84, 1.48  | 0.45    |
| North Central                                                                        | 1.14         | 0.89, 1.46  | 0.30    |
| South                                                                                | 0.82         | 0.63, 1.07  | 0.15    |
| <b>Year of Index Self-injury</b>                                                     |              |             |         |
| 2008                                                                                 | Referent     |             |         |
| 2009                                                                                 | 1.76         | 0.87, 3.57  | 0.12    |
| 2010                                                                                 | 2.09         | 1.05, 4.16  | 0.04    |
| 2011                                                                                 | 1.57         | 0.80, 3.10  | 0.19    |
| 2012                                                                                 | 2.23         | 1.14, 4.34  | 0.02    |
| 2013                                                                                 | 2.18         | 1.13, 4.21  | 0.02    |
| 2014                                                                                 | 2.02         | 1.05, 3.89  | 0.04    |
| 2015                                                                                 | 1.62         | 0.84, 3.12  | 0.15    |
| <b>Number of Unique Categories of Mood Disorder Diagnoses in Year Prior to Index</b> |              |             |         |
| 0                                                                                    | Referent     |             |         |
| 1                                                                                    | 3.10         | 2.41, 4.00  | <0.0001 |
| 2                                                                                    | 4.98         | 3.82, 6.48  | <0.0001 |
| 3                                                                                    | 7.87         | 5.84, 10.62 | <0.0001 |
| 4                                                                                    | 7.82         | 4.98, 12.28 | <0.0001 |
| 5                                                                                    | 6.11         | 2.22, 16.81 | 0.0005  |

### Cumulative Hazard Curve

Subsequent Self-Injury Stratified by Hospitalization in Psych Hospital >7 Days After Index

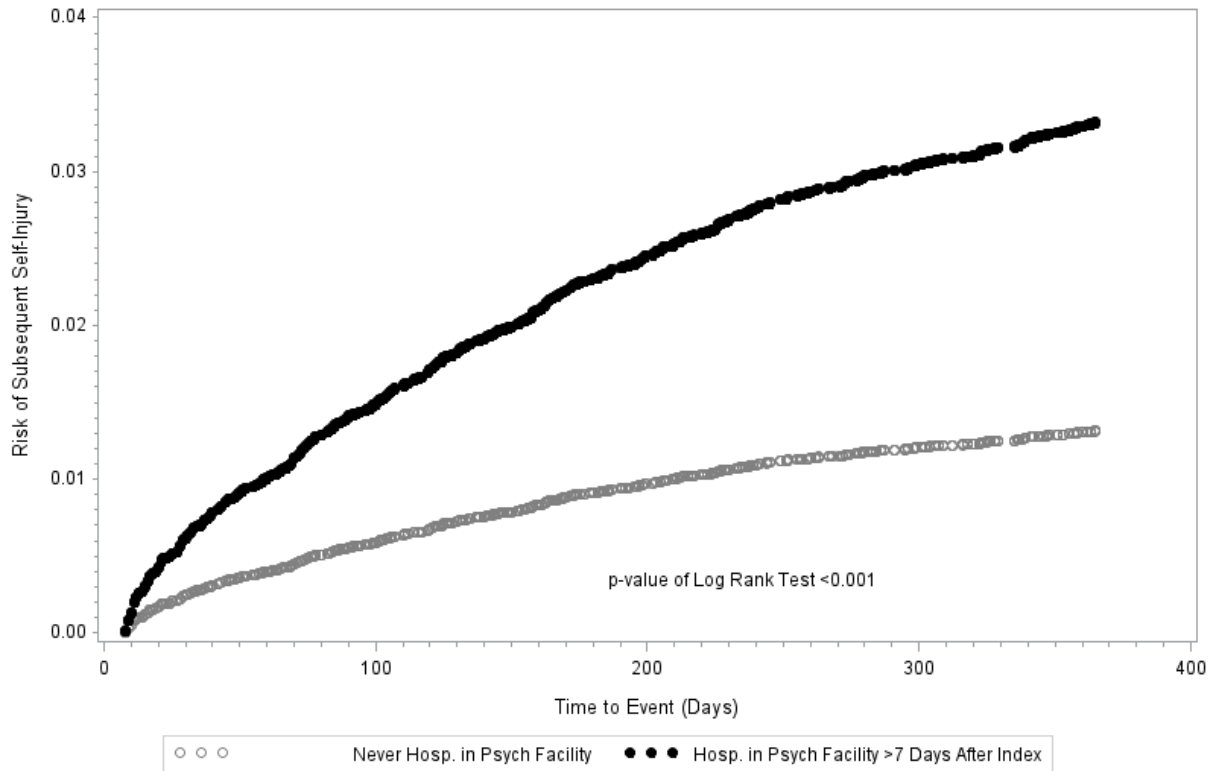

Cumulative Hazard Curve showing risk of subsequent self-injury in 365 days following index, stratified by whether the patient had at least 1 inpatient hospitalization in a psychiatric facility **in year after index event**. Adjusted for patient age (continuous), sex, region of residence, health insurance plan type, calendar year of index self-injury, and psychiatric disorders summary score.



Characteristics of Patients Medically Treatment for Self-injuries from 2008-2015 and their hospitalization status **in year after index self- injury event.**

| Characteristics                                             | No hospitalization in psychiatric facility<br>n= 29,120 |              | Hospitalization in psychiatric facility in in year after index self-injury event<br>n = 1196 |             | P value           |
|-------------------------------------------------------------|---------------------------------------------------------|--------------|----------------------------------------------------------------------------------------------|-------------|-------------------|
|                                                             | Mean                                                    | SD           | Mean                                                                                         | SD          |                   |
| Age (years)                                                 | <b>14.1</b>                                             | <b>± 3.1</b> | <b>15.2</b>                                                                                  | <b>±1.8</b> | <b>&lt;0.0001</b> |
| Age (years)                                                 | N                                                       | Row %        | N                                                                                            | Row %       |                   |
| 6-11                                                        | <b>5768</b>                                             | <b>99</b>    | <b>19</b>                                                                                    | <b>0.3</b>  |                   |
| 12-14                                                       | <b>4293</b>                                             | <b>96</b>    | <b>188</b>                                                                                   | <b>4</b>    | <b>&lt;0.0001</b> |
| 15-18                                                       | <b>19,059</b>                                           | <b>95</b>    | <b>989</b>                                                                                   | <b>5</b>    |                   |
| Gender                                                      |                                                         |              |                                                                                              |             |                   |
| Male                                                        | <b>13,386</b>                                           | <b>97</b>    | <b>383</b>                                                                                   | <b>3</b>    |                   |
| Female                                                      | <b>15,734</b>                                           | <b>95</b>    | <b>813</b>                                                                                   | <b>5</b>    | <b>&lt;0.0001</b> |
| Type of health plan                                         |                                                         |              |                                                                                              |             |                   |
| Comprehensive                                               | 217                                                     | 98           | 4                                                                                            | 2           |                   |
| Exclusive/Preferred provider org.                           | 19,309                                                  | 96           | 757                                                                                          | 4           |                   |
| Health maintenance organization                             | 2681                                                    | 96           | 123                                                                                          | 4           |                   |
| Point of service                                            | 1616                                                    | 96           | 67                                                                                           | 4           | 0.0006            |
| Consumer-directed/High-deductible                           | 5079                                                    | 96           | 224                                                                                          | 4           |                   |
| Missing                                                     | 218                                                     |              | 21                                                                                           |             |                   |
| Geographic region                                           |                                                         |              |                                                                                              |             |                   |
| Northeast                                                   | <b>4807</b>                                             | <b>98</b>    | <b>87</b>                                                                                    | <b>2</b>    |                   |
| North Central                                               | <b>7876</b>                                             | <b>96</b>    | <b>331</b>                                                                                   | <b>4</b>    |                   |
| South                                                       | <b>10,203</b>                                           | <b>96</b>    | <b>419</b>                                                                                   | <b>4</b>    | <b>&lt;0.0001</b> |
| West                                                        | <b>6084</b>                                             | <b>94</b>    | <b>358</b>                                                                                   | <b>6</b>    |                   |
| Missing                                                     | <b>150</b>                                              |              | <b>1</b>                                                                                     |             |                   |
| Year of index self-injury                                   |                                                         |              |                                                                                              |             |                   |
| 2008                                                        | <b>1297</b>                                             | <b>97</b>    | <b>37</b>                                                                                    | <b>3</b>    |                   |
| 2009                                                        | <b>2182</b>                                             | <b>97</b>    | <b>66</b>                                                                                    | <b>3</b>    |                   |
| 2010                                                        | <b>2688</b>                                             | <b>98</b>    | <b>65</b>                                                                                    | <b>2</b>    |                   |
| 2011                                                        | <b>4234</b>                                             | <b>98</b>    | <b>108</b>                                                                                   | <b>2</b>    |                   |
| 2012                                                        | <b>3576</b>                                             | <b>96</b>    | <b>151</b>                                                                                   | <b>4</b>    | <b>&lt;0.0001</b> |
| 2013                                                        | <b>4210</b>                                             | <b>95</b>    | <b>223</b>                                                                                   | <b>5</b>    |                   |
| 2014                                                        | <b>4604</b>                                             | <b>95</b>    | <b>245</b>                                                                                   | <b>5</b>    |                   |
| 2015                                                        | <b>6329</b>                                             | <b>95</b>    | <b>301</b>                                                                                   | <b>5</b>    |                   |
| Mental health assessment performed during index self-injury | <b>145</b>                                              | <b>87</b>    | <b>21</b>                                                                                    | <b>13</b>   | <b>&lt;0.0001</b> |

Diagnoses in the year prior to the index self-injury stratified by whether the patient was hospitalized in a psychiatric facility **in year after index self-injury event**.

| Dxs in the year prior to index self-injury  | No hospitalization in psychiatric facility<br>n= 29,120 |            | Hospitalization in psychiatric facility in year after index self-injury event<br>n = 1196 |           | P value           |
|---------------------------------------------|---------------------------------------------------------|------------|-------------------------------------------------------------------------------------------|-----------|-------------------|
|                                             | N                                                       | Column %   | N                                                                                         | Column %  |                   |
| Disruptive Mood Dysregulation Dis.          | 144                                                     | 0.5        | 22                                                                                        | 2         | <0.0001           |
| Major Depressive Dis.                       | 3866                                                    | 13         | 557                                                                                       | 47        | <0.0001           |
| Persistent Depressive Dis. (Dysthymia)      | 1042                                                    | 3.6        | 140                                                                                       | 12        | <0.0001           |
| Pre-Menstrual Dysphoric Dis.                | 70                                                      | 0.2        | 14                                                                                        | 1         | <0.0001           |
| Depressive Dis. due to Med. Condition       | 134                                                     | 0.5        | 16                                                                                        | 1         | <0.0001           |
| Other Specified/Unspecified                 | 4694                                                    | 16         | 593                                                                                       | 50        | <0.0001           |
| <b>Any unipolar mood disorder</b>           | <b>6541</b>                                             | <b>22</b>  | <b>790</b>                                                                                | <b>66</b> | <b>&lt;0.0001</b> |
| Bipolar I                                   | 490                                                     | 1.7        | 90                                                                                        | 8         | <0.0001           |
| Bipolar II                                  | 282                                                     | 1          | 49                                                                                        | 4         | <0.0001           |
| Cyclothymic Disorder                        | 23                                                      | 0.08       | 5                                                                                         | 0.4       | 0.004             |
| Bipolar due to Med. Condition               | 133                                                     | 0.5        | 15                                                                                        | 1         | 0.0001            |
| Other Specified/Unspecified                 | 6                                                       | 0.02       | 1                                                                                         | 0.08      | 0.25              |
| <b>Any bipolar mood disorder</b>            | <b>836</b>                                              | <b>2.9</b> | <b>136</b>                                                                                | <b>11</b> | <b>&lt;0.0001</b> |
| Delusional Dis.                             | 17                                                      | 0.06       | 6                                                                                         | 0.5       | <0.0001           |
| Brief Psychotic Dis.                        | 117                                                     | 0.40       | 32                                                                                        | 3         | <0.0001           |
| Schizophreniform Dis.                       | 10                                                      | 0.03       | 3                                                                                         | 0.3       | 0.01              |
| Schizophrenia                               | 41                                                      | 0.1        | 7                                                                                         | 0.6       | 0.0002            |
| Schizoaffective Dis. (Bipolar & Depressive) | 54                                                      | 0.2        | 16                                                                                        | 1         | <0.0001           |
| Psychotic Dis. due to Med. Condition        | 9                                                       | 0.03       | 0                                                                                         | 0         | --                |
| Other Specified/Unspecified                 | 751                                                     | 2.6        | 139                                                                                       | 12        | <0.0001           |
| <b>Any psychotic disorder</b>               | <b>806</b>                                              | <b>2.8</b> | <b>152</b>                                                                                | <b>13</b> | <b>&lt;0.0001</b> |
| Conduct Disorder                            | 51                                                      | 0.2        | 8                                                                                         | 0.7       | 0.0001            |
| Disruptive Behavior Disorder                | 599                                                     | 2.1        | 70                                                                                        | 6         | <0.0001           |
| ODD                                         | 900                                                     | 3.1        | 127                                                                                       | 11        | <0.0001           |
| ADHD                                        | 3589                                                    | 12         | 287                                                                                       | 24        | <0.0001           |
| <b>Any behavior disorder</b>                | <b>4335</b>                                             | <b>15</b>  | <b>388</b>                                                                                | <b>32</b> | <b>&lt;0.0001</b> |
| Generalized Anxiety Disorder (GAD)          | 1543                                                    | 5.3        | 214                                                                                       | 18        | <0.0001           |
| Panic Disorders                             | 413                                                     | 1.4        | 52                                                                                        | 4         | <0.0001           |
| Obsessive Compulsive Disorder (OCD)         | 325                                                     | 1.1        | 46                                                                                        | 4         | <0.0001           |
| Post-Traumatic Stress Disorder (PTSD)       | 569                                                     | 2.0        | 101                                                                                       | 8         | <0.0001           |
| Acute Stress Disorder                       | 50                                                      | 0.2        | 5                                                                                         | 0.4       | 0.07              |
| Phobias                                     | 306                                                     | 1.1        | 43                                                                                        | 4         | <0.0001           |
| Separation Anxiety                          | 32                                                      | 0.1        | 3                                                                                         | 0.3       | 0.16              |
| Adjustment Disorder                         | 63                                                      | 0.2        | 7                                                                                         | 0.6       | 0.009             |

|                                            |               |            |            |           |                   |
|--------------------------------------------|---------------|------------|------------|-----------|-------------------|
| <b>Any anxiety disorder</b>                | <b>2628</b>   | <b>9.0</b> | <b>342</b> | <b>29</b> | <b>&lt;0.0001</b> |
|                                            |               |            |            |           |                   |
| <b>Summary score of disorder diagnoses</b> |               |            |            |           |                   |
| <b>0</b>                                   | <b>19,592</b> | <b>67</b>  | <b>266</b> | <b>22</b> |                   |
| <b>1</b>                                   | <b>5526</b>   | <b>19</b>  | <b>363</b> | <b>30</b> |                   |
| <b>2</b>                                   | <b>2724</b>   | <b>9.4</b> | <b>331</b> | <b>28</b> |                   |
| <b>3</b>                                   | <b>979</b>    | <b>3.4</b> | <b>173</b> | <b>14</b> | <b>&lt;0.0001</b> |
| <b>4</b>                                   | <b>260</b>    | <b>0.9</b> | <b>51</b>  | <b>4</b>  |                   |
| <b>5</b>                                   | <b>39</b>     | <b>0.1</b> | <b>12</b>  | <b>1</b>  |                   |

Patient services utilization during the 12 months before and after index self-injury event. Stratified by hospitalization in psychiatric facility **in year after the index event**.

| Characteristics                                                                                                             | No hospitalization in psychiatric facility<br>N = 29,120 | Hospitalization in psychiatric facility in year after index self-injury event<br>n = 1196 | P-value           |
|-----------------------------------------------------------------------------------------------------------------------------|----------------------------------------------------------|-------------------------------------------------------------------------------------------|-------------------|
| <i>12 months PRIOR TO index self-injury healthcare utilization</i>                                                          |                                                          |                                                                                           |                   |
| <b>Inpatient claims</b>                                                                                                     |                                                          |                                                                                           |                   |
| ≥1 <b>Inpatient hospitalization</b> (any location) N (%)                                                                    | <b>2820 (10)</b>                                         | <b>471 (39)</b>                                                                           | <b>&lt;0.0001</b> |
| Among those with ≥1 # of <b>Inpatient hospitalizations</b> (unique admissions, any location) Mean (SD)                      | <b>1.6 (± 1.2)</b>                                       | <b>1.9 (± 1.5)</b>                                                                        | <b>&lt;0.0001</b> |
| <b>ER claims</b>                                                                                                            |                                                          |                                                                                           |                   |
| ≥1 ER visit N (%)                                                                                                           | <b>9745 (33)</b>                                         | <b>641 (54)</b>                                                                           | <b>&lt;0.0001</b> |
| Among those with ≥1, ER visits (unique days) Mean (SD)                                                                      | <b>1.9 (± 1.8)</b>                                       | <b>2.5 (± 3.1)</b>                                                                        | <b>&lt;0.0001</b> |
| <b>Outpatient claims</b>                                                                                                    |                                                          |                                                                                           |                   |
| ≥1 outpatient visit ( <b>any psych facility location</b> ) N (%)                                                            | <b>549 (2)</b>                                           | <b>202 (17)</b>                                                                           | <b>&lt;0.0001</b> |
| Among those with ≥1, # of <b>outpatient visits</b> (unique dates of service, <b>any psych facility location</b> ) Mean (SD) | 8.2 (± 10.7)                                             | 7.3 (± 9.3)                                                                               | 0.26              |
| ≥1 outpatient visit at <b>any type of facility</b> N (%)                                                                    | <b>27,246 (94)</b>                                       | <b>1164 (97)</b>                                                                          | <b>&lt;0.0001</b> |
| # of outpatient visits (unique dates of service) at <b>any type of facility</b> Mean (SD)                                   | <b>10.5 (± 14.6)</b>                                     | <b>21.1 (± 22.4)</b>                                                                      | <b>&lt;0.0001</b> |
| ≥1 <b>All-indication medication filled</b> N (%)                                                                            | <b>18,160 (62)</b>                                       | <b>929 (78)</b>                                                                           | <b>&lt;0.0001</b> |
| Among those with ≥1, # of all-indication medications filled Mean (SD)                                                       | <b>10.0 (± 12.3)</b>                                     | <b>18.3 (± 20.2)</b>                                                                      | <b>&lt;0.0001</b> |
| <i>12 months after index self-injury healthcare utilization</i>                                                             |                                                          |                                                                                           |                   |
| <b>Inpatient claims</b>                                                                                                     |                                                          |                                                                                           |                   |
| ≥1 <b>Inpatient hospitalization</b> (any location) N (%)                                                                    | <b>3066 (11)</b>                                         | <b>1084 (91)</b>                                                                          | <b>&lt;0.0001</b> |
| Among those with ≥1 # of <b>Inpatient hospitalizations</b> (unique admissions, any location) Mean (SD)                      | <b>1.7 (±1.4)</b>                                        | <b>2.1 (± 1.9)</b>                                                                        | <b>&lt;0.0001</b> |
| <b>ER claims</b>                                                                                                            |                                                          |                                                                                           |                   |
| ≥1 ER visit N (%)                                                                                                           | <b>10,058 (35)</b>                                       | <b>1021 (85)</b>                                                                          | <b>&lt;0.0001</b> |
| Among those with ≥1, ER visits (unique days) Mean (SD)                                                                      | <b>2.1 (± 2.5)</b>                                       | <b>3.2 (±2.9)</b>                                                                         | <b>&lt;0.0001</b> |
| <b>Outpatient claims</b>                                                                                                    |                                                          |                                                                                           |                   |
| ≥1 outpatient visit ( <b>any psych facility location</b> ) N (%)                                                            | <b>960 (3)</b>                                           | <b>507 (42)</b>                                                                           | <b>&lt;0.0001</b> |
| Among those with ≥1, # of <b>outpatient visits</b> (unique dates of service, <b>any psych facility location</b> ) Mean (SD) | 8.9 (± 12)                                               | 8.3 (± 11.7)                                                                              | 0.33              |
| ≥1 outpatient visit at <b>any type of facility</b> N (%)                                                                    | <b>27,755 (95)</b>                                       | <b>1176 (98)</b>                                                                          | <b>&lt;0.0001</b> |
| # of outpatient visits (unique dates of service) at <b>any type of facility</b> Mean (SD)                                   | <b>14.4 (± 18.5)</b>                                     | <b>34.1 (± 27.6)</b>                                                                      | <b>&lt;0.0001</b> |
| ≥1 <b>All-indication medication filled</b> N (%)                                                                            | <b>19,003 (65)</b>                                       | <b>1021 (85)</b>                                                                          | <b>&lt;0.0001</b> |
| Among those with ≥1, # of all-indication medications filled Mean (SD)                                                       | <b>13.1 (± 15)</b>                                       | <b>30.4 (± 21.7)</b>                                                                      | <b>&lt;0.0001</b> |
| <b>Subsequent self-injury (yes/no)</b> N (%)                                                                                | <b>417 (1.4)</b>                                         | <b>202 (17)</b>                                                                           | <b>&lt;0.0001</b> |
| Median time to subsequent self-injury (SD [range])                                                                          | 117 (± 101 (8-365))                                      | 110 (±95 (9-355))                                                                         | 0.54              |

Hazard ratios and 95% confidence intervals of risk of subsequent self-injury in 365 days following index self-injury.

| Variable                                                                             | Hazard Ratio | 95% CI     | p-value |
|--------------------------------------------------------------------------------------|--------------|------------|---------|
| <b>Hospitalization in psychiatric hospital in year after index</b>                   | 6.86         | 5.71, 8.23 | <0.0001 |
| <b>Age</b>                                                                           | 1.07         | 1.03, 1.11 | 0.0002  |
| <b>Male</b>                                                                          | 0.66         | 0.55, 0.78 | <0.0001 |
| <b>Health Insurance Type</b>                                                         |              |            |         |
| Consumer Directed/High Deductible                                                    | Referent     |            |         |
| Comprehensive Insurance                                                              | 0.60         | 0.19, 1.90 | 0.39    |
| Exclusive/Preferred Provider Org.                                                    | 0.91         | 0.74, 1.11 | 0.35    |
| Health Maintenance Org.                                                              | 1.11         | 0.82, 1.50 | 0.49    |
| Point of Service                                                                     | 0.88         | 0.59, 1.31 | 0.52    |
| <b>Region</b>                                                                        |              |            |         |
| West                                                                                 | Referent     |            |         |
| Northeast                                                                            | 1.08         | 0.83, 1.40 | 0.58    |
| North Central                                                                        | 1.18         | 0.96, 1.47 | 0.12    |
| South                                                                                | 0.82         | 0.66, 1.03 | 0.09    |
| <b>Year of Index Self-injury</b>                                                     |              |            |         |
| 2008                                                                                 | Referent     |            |         |
| 2009                                                                                 | 1.88         | 0.96, 3.67 | 0.06    |
| 2010                                                                                 | 2.05         | 1.06, 3.96 | 0.03    |
| 2011                                                                                 | 1.76         | 0.93, 3.35 | 0.08    |
| 2012                                                                                 | 2.30         | 1.22, 4.32 | 0.01    |
| 2013                                                                                 | 2.31         | 1.24, 4.31 | 0.01    |
| 2014                                                                                 | 2.36         | 1.27, 4.38 | 0.01    |
| 2015                                                                                 | 1.92         | 1.03, 3.56 | 0.04    |
| <b>Number of Unique Categories of Mood Disorder Diagnoses in Year Prior to Index</b> |              |            |         |
| 0                                                                                    | Referent     |            |         |
| 1                                                                                    | 2.48         | 1.99, 3.09 | <0.0001 |
| 2                                                                                    | 3.53         | 2.80, 4.46 | <0.0001 |
| 3                                                                                    | 4.86         | 3.71, 6.37 | <0.0001 |
| 4                                                                                    | 4.29         | 2.76, 6.66 | <0.0001 |
| 5                                                                                    | 3.39         | 1.25, 9.23 | 0.02    |
